# Supplementary material for: The life cycle of upper-level troughs and ridges: a novel detection method, climatologies and Lagrangian characteristics
Source: Copernicus journal article supplement (doi:10.5194/wcd-1-459-2020), 2020-09-10
Supplement: Supplementary file 1 [file wcd-1-459-2020-supplement.pdf]

Supplement of Weather Clim. Dynam., 1, 459–479, 2020  
<https://doi.org/10.5194/wcd-1-459-2020-supplement>  
© Author(s) 2020. This work is distributed under  
the Creative Commons Attribution 4.0 License.

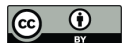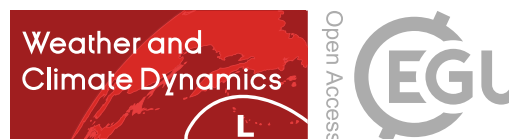

*Supplement of*

## **The life cycle of upper-level troughs and ridges: a novel detection method, climatologies and Lagrangian characteristics**

**Sebastian Schemm et al.**

*Correspondence to:* Sebastian Schemm ([sebastian.schemm@env.ethz.ch](mailto:sebastian.schemm@env.ethz.ch))

The copyright of individual parts of the supplement might differ from the CC BY 4.0 License.

**Abstract.** Supplementary figures:

- 300-hPa trough and ridge climatologies (Fig. 1 and Fig. 2).
- 500-hPa trough and ridge climatologies with short-lived features removed (Fig. 3).
- Climatologies of the mean trough lifetime at the 500-hPa level (Fig. 3).

## Troughs

(a) Nov–Mar

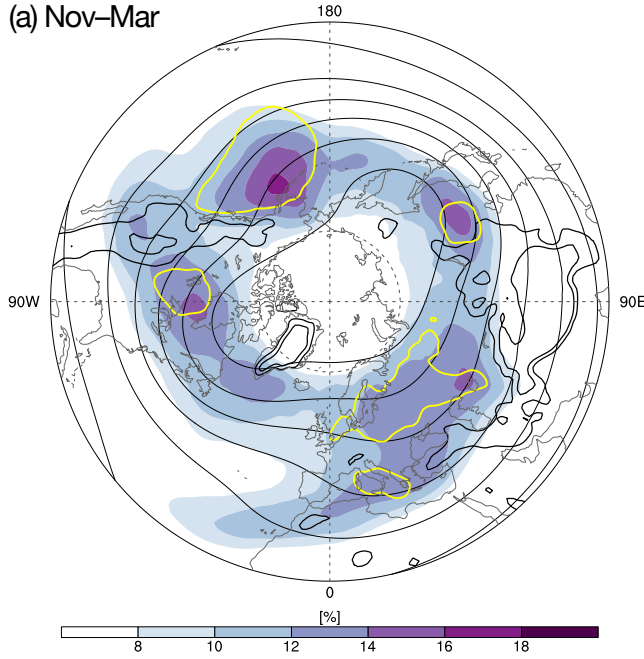

(b) Nov–Mar

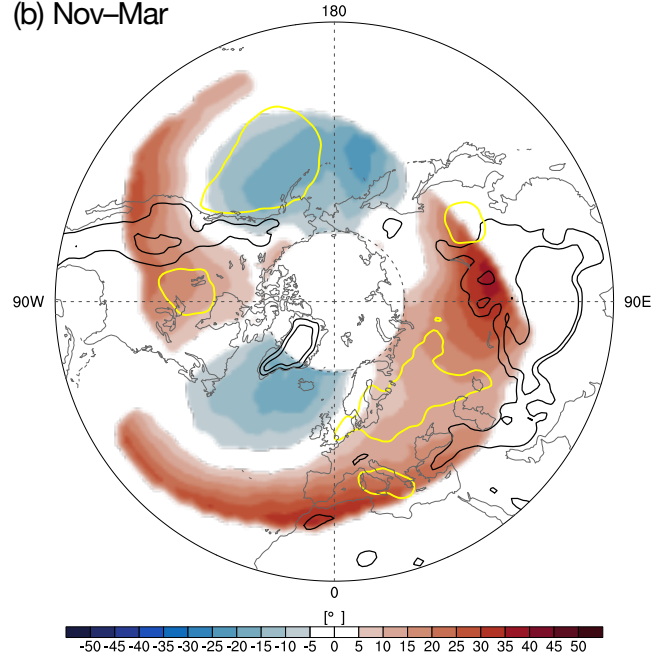

(c) May–Sep

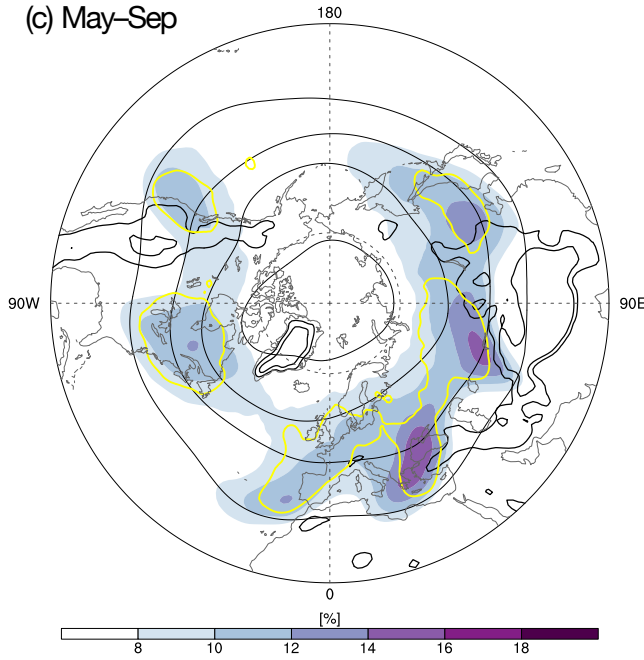

(d) May–Sep

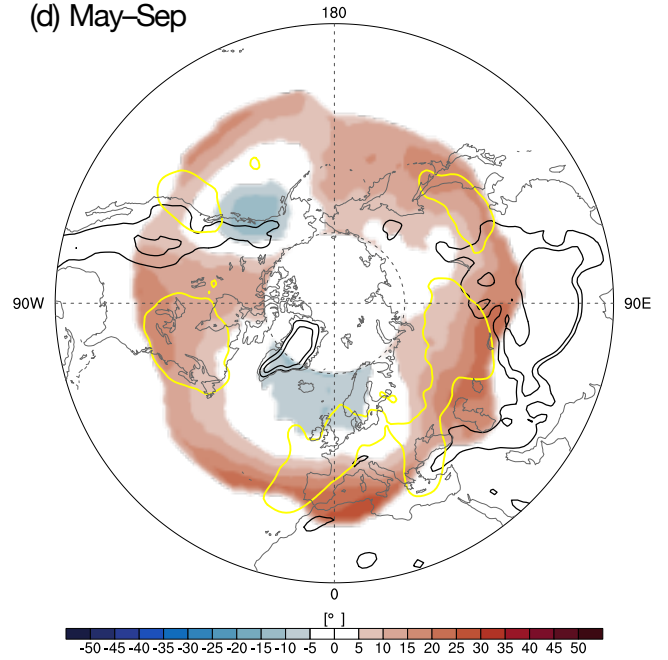

**Figure 1.** 300-hPa trough (left) detection frequencies and (right) corresponding horizontal orientation for the (a,b) cold (Nov–Mar) and (c,d) warm seasons (May–Sep).

## Ridges

(a) Nov–Mar

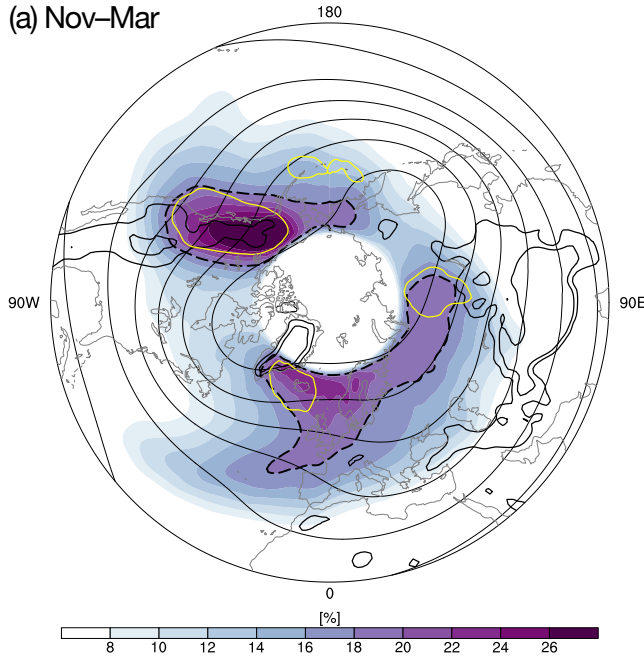

(b) Nov–Mar

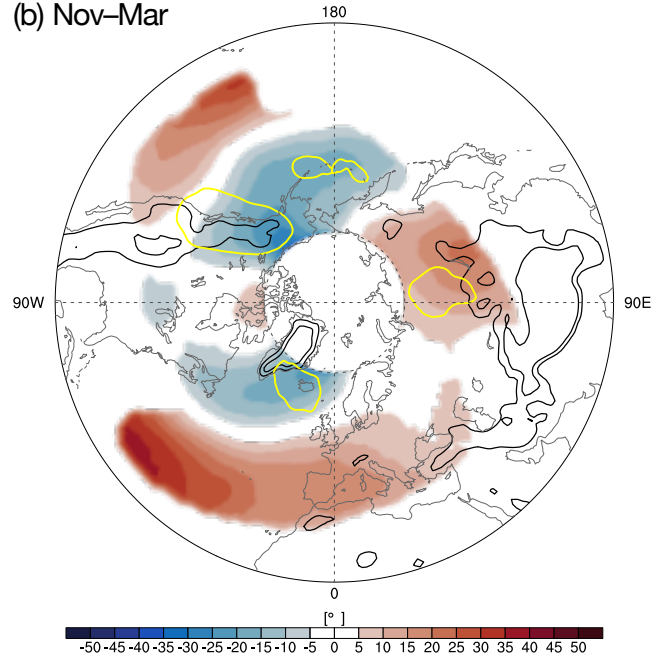

(c) May–Sep

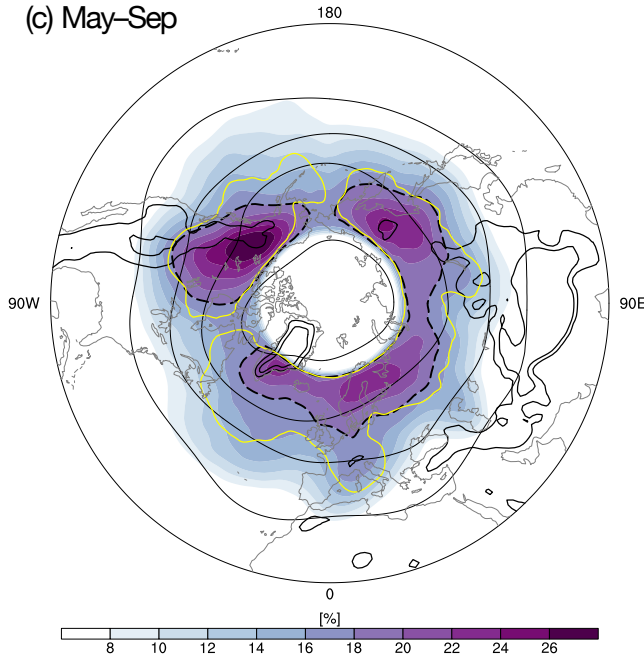

(d) May–Sep

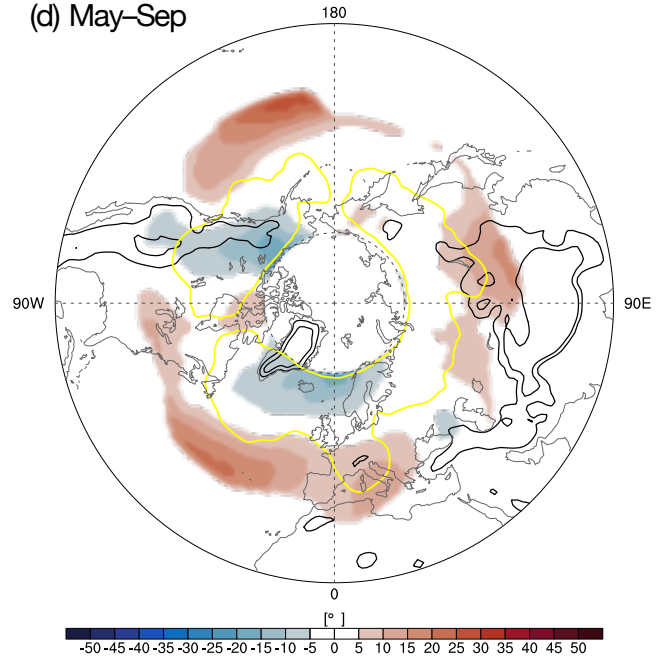

**Figure 2.** 300-hPa ridge (left) detection frequencies and (right) corresponding horizontal orientation for the (a,b) cold (Nov–Mar) and (c,d) warm seasons (May–Sep).

## Troughs

(a) Nov–Mar (Trough lifetime > 24 hours)

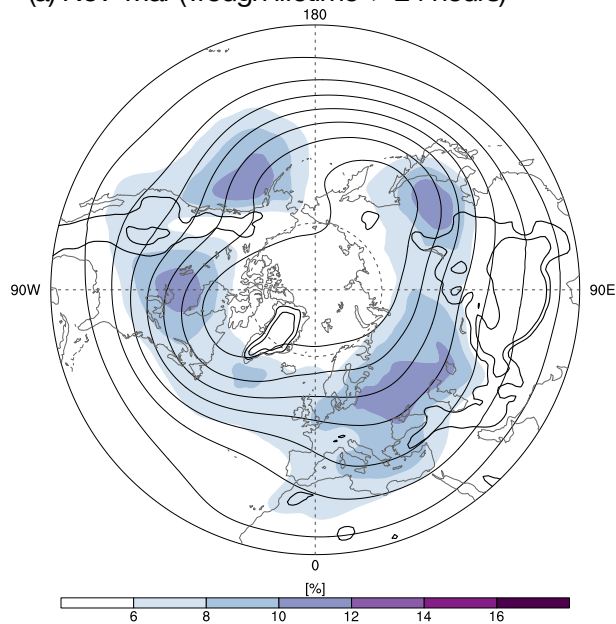

## Ridges

(b) Nov–Mar (Ridge lifetime > 24 hours)

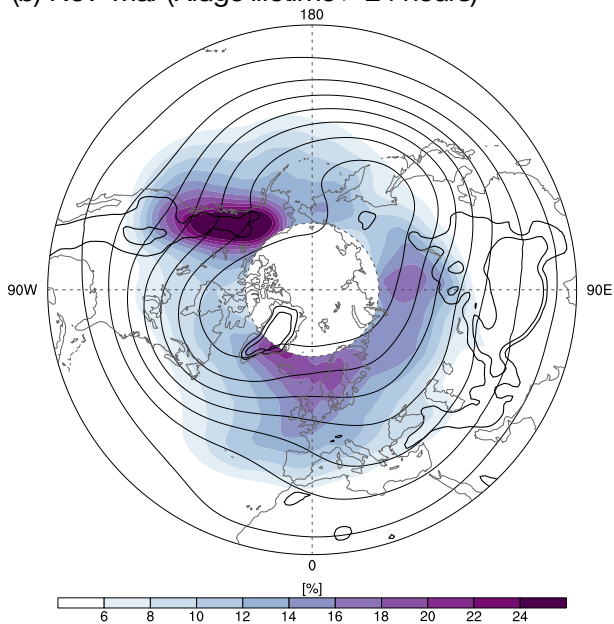

(c) May–Sep (Trough lifetime > 24 hours)

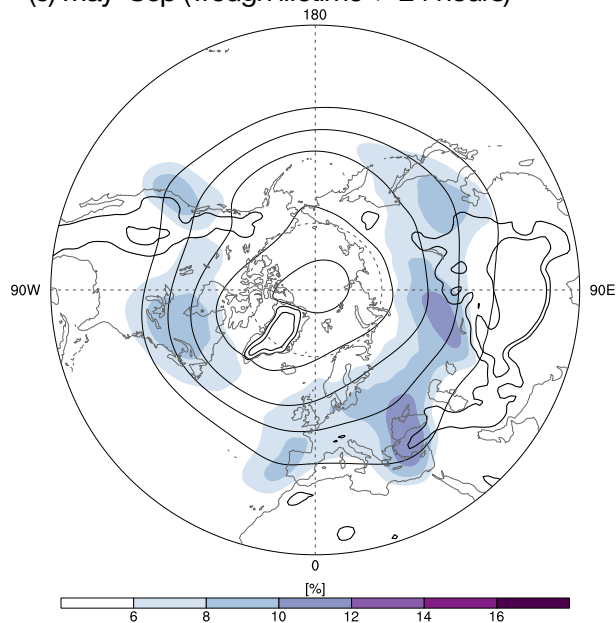

(d) May–Sep (Ridge lifetime > 24 hours)

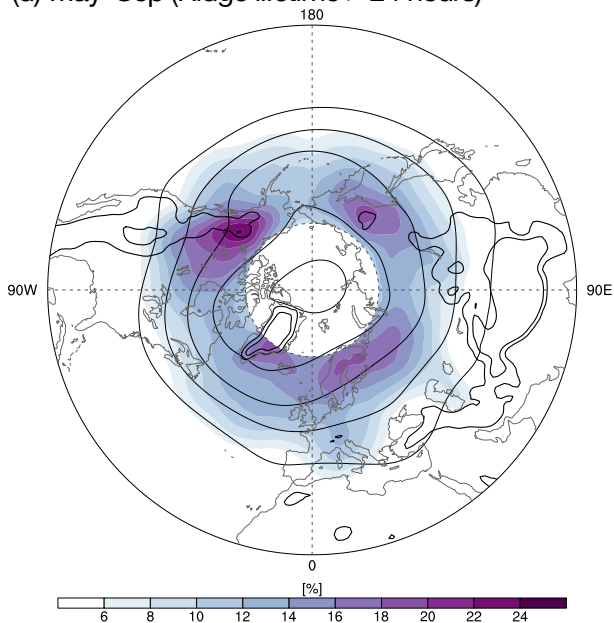

**Figure 3.** 500-hPa trough (left column) and ridge (right column) detection frequencies with short-lived features ( $< 24$  hours) excluded.

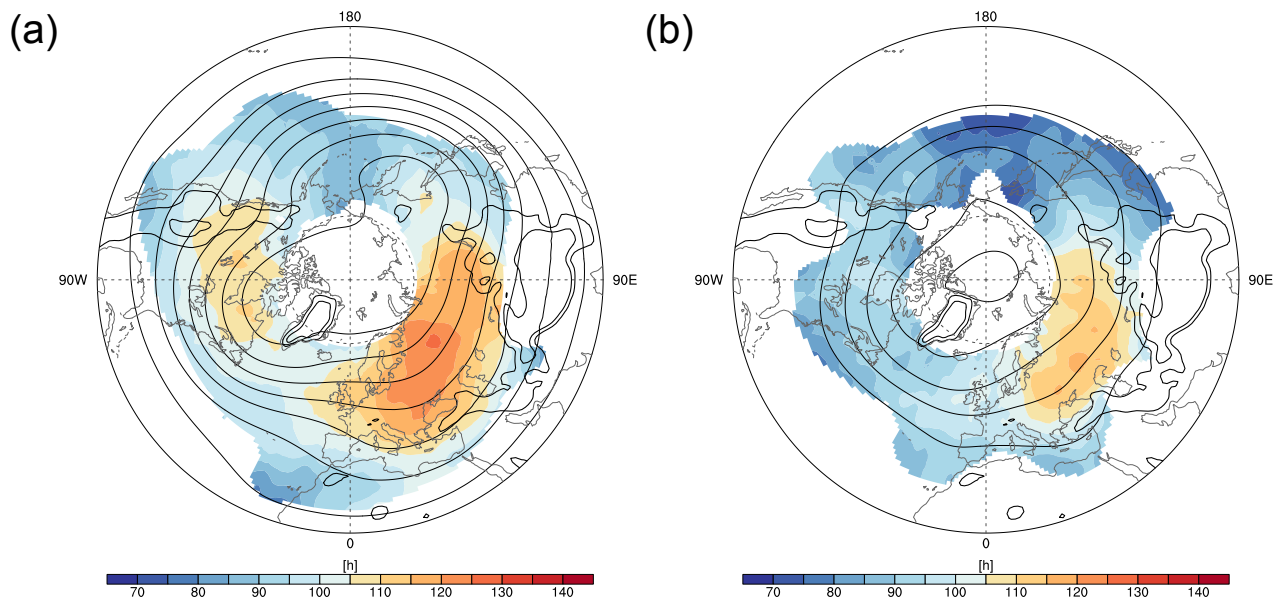

**Figure 4.** The mean trough lifetime during (a) the cold (Nov–Mar) and (b) warm season (May–Sep).
